# Supplementary material
Source: Springer Nature journal article supplement (https://www.springermedizin.de/resource/supplementary/12889_2009_2058_MOESM7_ESM.pdf/9484450)
Supplement: MOESM7 [file 9484450]

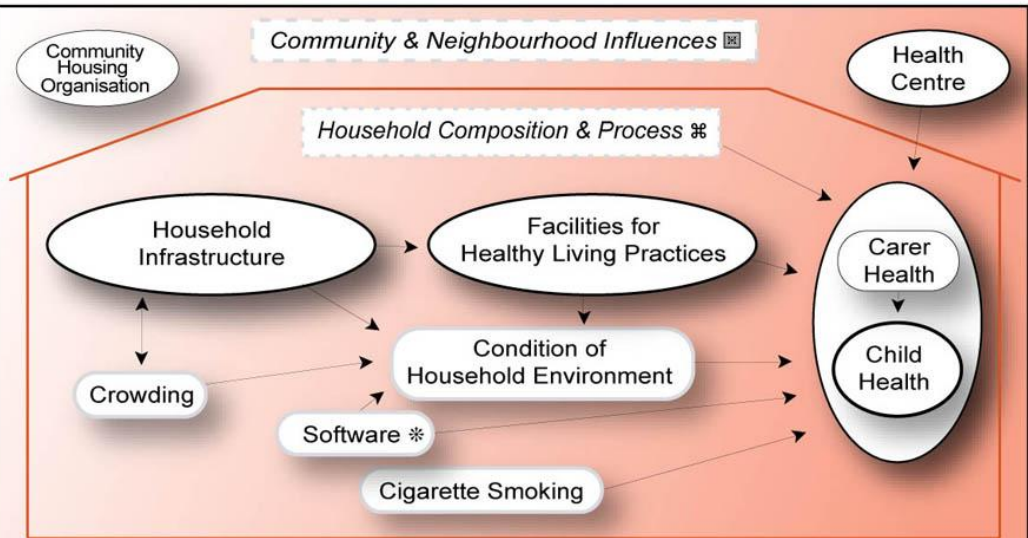

☒ Population; community location and remoteness; general environmental health and infrastructure; general housing quality; availability of facilities; health service staffing; community housing management.

☘ Numbers of adults and children; child/carer and child/householder relationships; education/employment/income of household and main carer; community status of householder; mobility of household members; house maintenance and cleaning; negative life events; psychosocial circumstances; family and cultural connections.

\* Household cleaning equipment; soap for hand washing.
